# Supplementary material
Source: PubMed Central journal article supplement (PMC6354616)
Supplement: Supp_Table3.pdf [file Supp_Table3.pdf]

## Supplementary Data

SUPPLEMENTARY TABLE S3. SEQUENCES  
OF PRIMERS USED FOR QUANTITATIVE REVERSE  
TRANSCRIPTION POLYMERASE CHAIN REACTION

| <i>Genes</i> | <i>Forward (5'-3')</i>       | <i>Reverse (5'-3')</i>      |
|--------------|------------------------------|-----------------------------|
| p21          | cgctctacatcttctgcctt<br>agtc | gaacctctcattcaaccgc<br>ctag |
| Cyclin A1    | ctggttagttgaagtagga<br>gaag  | ttggttaggtatcatctgta<br>atg |
| Cyclin B1    | ttggttgatactgcctctcc         | tctgactgcttgcctctcc         |
| Cyclin D1    | tgaactacctggaccgcttc         | agcttgtcaccaggagcag         |
| Cyclin E     | aactgtgtcaagtggatgg          | ctgcttctaccgctctg           |
| GAPDH        | gaaggtgaaggtcggagtc          | gaagatggtgatgggatttc        |
| GADD34       | gaggaagaggaagctgctga         | tttctggccttaggggagt         |
| GADD45a      | gcgagaacgacatcaacatc         | tcccggcaaaaacaaataag        |
| GADD45B      | cagaagatgcagacggtgac         | ggactggatgagcgtgaagt        |
| GADD45G      | tacgctgatccaggctttct         | aacaggctgagcttctcaa         |
| GADD153      | aggaggaagaccaagggaga         | accattcgggtcaatcagagc       |
| KFL6         | tcgggagaaaaaggaggaat         | ctgaccaaaaactcgccaat        |
| ATF4         | ttcaccttcttacaacctcttc       | gctcatacagatccactatc        |
| sXBP1        | ctgagtcgcaatcaggtgcag        | atccatggggagatgttctgg       |
